# Supplementary material
Source: PubMed Central journal article supplement (PMC4264480)
Supplement: nl504093w_si_001.pdf [file nl504093w_si_001.pdf]

# Etched Colloidal LiFePO<sub>4</sub> Nanoplatelets Toward High-Rate Capable Li-ion Battery Electrodes

*Andrea Paolella<sup>1,2,†</sup>, Giovanni Bertoni<sup>1,3,†</sup>, Sergio Marras<sup>1,†</sup>, Enrico Dilella<sup>1</sup>, Massimo Colombo<sup>1</sup>, Mirko Prato<sup>1</sup>, Andreas Riedinger<sup>1,4</sup>, Mauro Povia<sup>1</sup>, Alberto Ansaldo<sup>1</sup>, Karim Zaghib<sup>2</sup>, Liberato Manna<sup>1\*</sup>, and Chandramohan George<sup>1,5\*</sup>*

<sup>1</sup>Nanochemistry Department, Istituto Italiano di Tecnologia, Via Morego 30, 16163 Genova, Italy

<sup>2</sup>Institut de recherche d'Hydro-Québec (IREQ), 1800 Boulevard Lionel Boulet, Varennes, QC, J3X1S1, Canada

<sup>3</sup>IMEM-CNR, Parco Area delle Scienze 37/A, 43124 Parma, Italy

<sup>4</sup>Optical Materials Engineering Laboratory, ETH Zurich, 8092 Zurich, Switzerland

<sup>5</sup>Institute for Manufacturing, Department of Engineering, 17 Charles Babbage Road, University of Cambridge, CB3 0FS, United Kingdom

<sup>†</sup> **A.P., G.B. and S.M. equally contributed to this work**

**KEYWORDS:** Nanocrystals, platelet-shape, LiFePO<sub>4</sub>, Li-ion batteries, rate performance

\* gc495@cam.ac.uk; liberato.manna@iit.it

## Supporting information

## Chemicals.

Oleylamine (OAm, 70% purum), 1-octadecene (technical grade, 90%), iron (II) chloride anhydrous (99.99% purum), ammonium phosphate dibasic ( $\geq 99.99\%$  purum), lithium iodide (beads,  $\geq 99.99\%$  purum),  $\alpha$ -D-glucose (96 % purum, anhydrous), electrochemical grade propylene carbonate, ethylene carbonate, diethyl carbonate, N-methyl-2-pyrrolidone, (poly) and vinylidene difluoride were purchased from Sigma Aldrich. Chloroform and ethanol were purchased from Carlo Erba. Coin type 2032 components (SS casing items) were purchased from Hohsen Corporation. Polypropylene (PP) microporous films were purchased from Cellguard. Carbon powder (carbon super P) was purchased from Alfa Aesar. Pure Li metal foils were purchased from Goodfellow.

## X-ray photoelectron spectroscopy (XPS) and Electron Energy Loss Spectroscopy (EELS) Quantification

The platelets were analyzed by X-ray photoelectron spectroscopy (XPS). Our data are in good agreement with those reported for 100 nm diameter  $\text{LiFePO}_4$  nanoparticles<sup>1</sup>. The particular shape of the Fe 2p spectrum, due to multiple splitting,<sup>1</sup> together with the position of the Fe 3p peak at 55.3 eV, is a confirmation that the oxidation state of Fe is +II. The P 2p spectrum can be easily decomposed in two spin-orbit components at 133.3 eV and 134.2 eV. These positions, together with the position of the O 1s peak at 531.4 eV, are in good agreement with the presence of  $(\text{PO}_4)^{3-}$  groups.<sup>2</sup>

Li ions can be detected by Electron Energy Loss Spectroscopy (EELS) in the electron microscope, by quantifying the ratio between the Li-K ionization edge intensity ( $\sim 55$  eV) and the Fe-L ionization edge ( $\sim 708$  eV), using model based techniques.<sup>3</sup> Unfortunately, the Li-K edge and Fe- $M_{2,3}$  edge have onsets at similar energies ( $\sim 55$  eV and  $\sim 54$  eV respectively, according to the EELS reference database from Gatan Inc.). Figure S3 illustrates the problem, showing the models used for the Li-K (blue line) and Fe-M (red line) ionization edges. To separate the two signals we verified the spectral intensity of the Fe- $M_{2,3}$  edge with respect to the Fe- $L_{2,3}$  edge (the last one usually used for quantification), by acquiring the spectra at the same conditions on a  $\text{Fe}_2\text{O}_3$  reference sample (from Aldrich Inc.). The intensity of the Fe- $M_{2,3}$  edge was then kept fixed to the ratio measured from the reference sample. The amount of signal left in the spectrum in the region 50-130 eV was then fitted with a Li-K cross section (see Figure S4). The quantification was performed using the model based technique as in EELSMODEL, and adding an

equalization function mimicking the density of states (DOS).<sup>4</sup> Despite model-based quantification can give very accurate and precise results in case of Poisson statistics, in our case the precision of the fits is lowered by the high background level in the spectra at low energy loss. We found that a log-polynomial function better describes the background of the spectra in the low-energy range with respect to the power-law function. The precision in the estimated amounts was around 10% for Fe, O, and P, and around 20% for Li, respectively. Figure S4 shows the results of model-based fitting on the different elements. As a result, we obtained a Li/Fe ratio of 0.7 ( $\pm 0.2$ ), a P/Fe ratio of 0.9 ( $\pm 0.1$ ) and O/Fe ratio of 3.8 ( $\pm 0.4$ ), close to the expected stoichiometry of  $\text{LiFePO}_4$ .

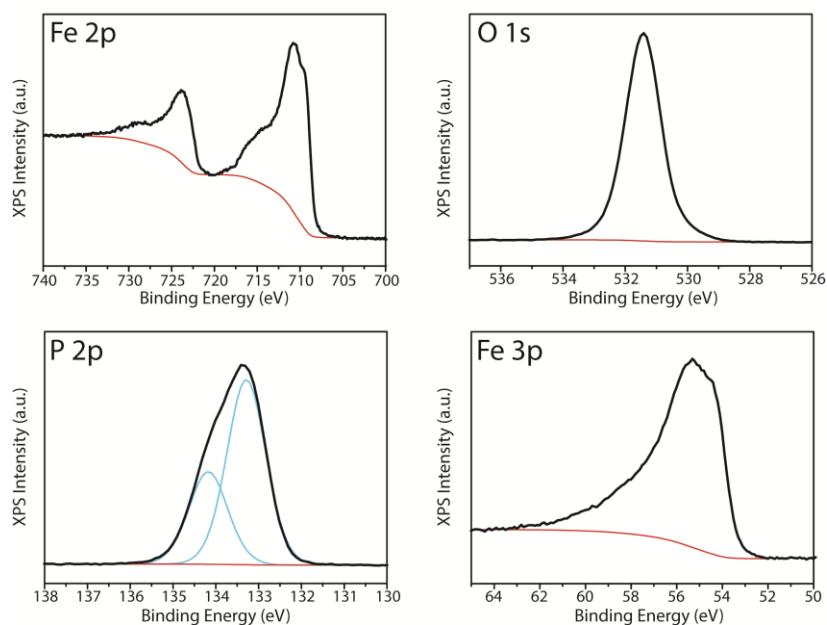

**Figure S1** High resolution XPS spectra narrow scans on Fe 2p, O 1s, P 2p and Fe 3p binding energy ranges. Experimental data (black lines) are shown together with Shirley-type backgrounds (red lines). Deconvolution of the P 2p doublet using Gauss-Lorentz profiles is also shown. Note that the Li 1s peak (usually found at approx. 55 eV) is buried in the intense Fe 3p peak since, in our experimental conditions, its relative sensitivity factor is about 15 times smaller than that of Fe 3p.

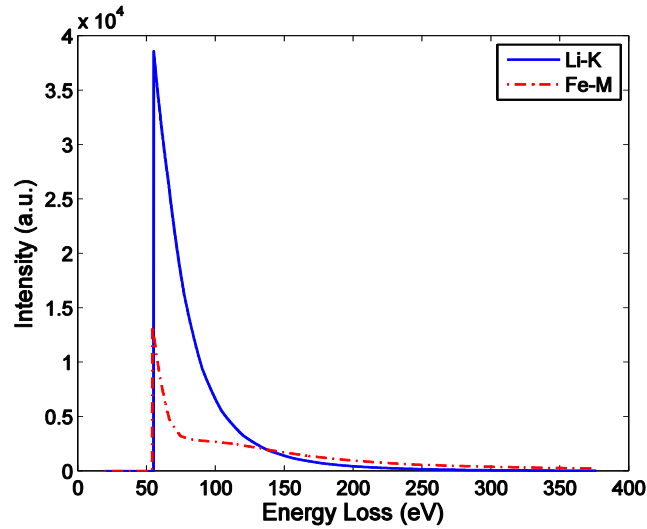

**Figure S2.** Comparison of the relative intensities of the Li-K ionization edge and the Fe-M<sub>2,3</sub> ionization edge, calculated using Hartree-Slater parameterized cross sections, at  $E_0 = 200$  kV incident energy,  $\alpha = 1.5$  mrad, and  $\beta = 5.0$  mrad as in the experimental conditions.

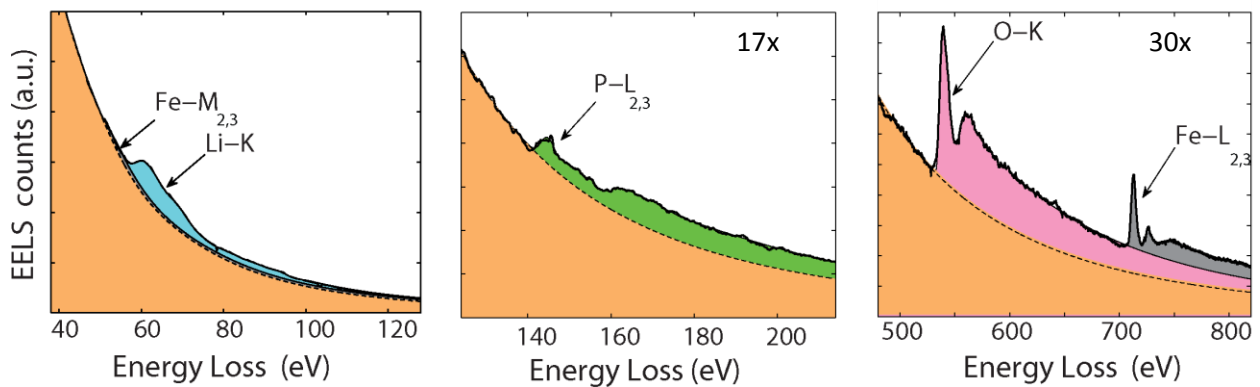

**Figure S3.** The results of model based EELS fits of the Li-K, the P-L<sub>2,3</sub>, the O-K and Fe-L<sub>2,3</sub> edges, respectively. The Li-K cross section is multiplied by a DOS function. Note the high background in the spectrum from Li-K, making a precise quantification of the Li amount a difficult task.

## $^{19}\text{F}$ -NMR spectrum $\text{LiFePO}_4$ before and after etching

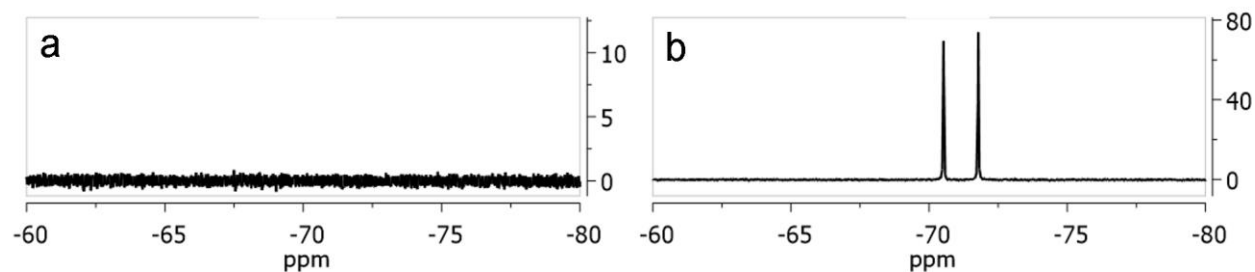

**Figure S4:** a)  $^{19}\text{F}$ -NMR spectrum from a solution of the as-synthesized NCs(a) and etched NCs (b). No  $\text{PF}_6^-$  could be detected in the spectrum a) while in b) the presence of  $\text{PF}_6^-$  is confirmed by the characteristic doublet at -70.5 and 71.8 ppm.<sup>5</sup>

## XRD analysis of LFP nanoplatelets after $\text{PF}_6^-$ treatment and after carbon coating

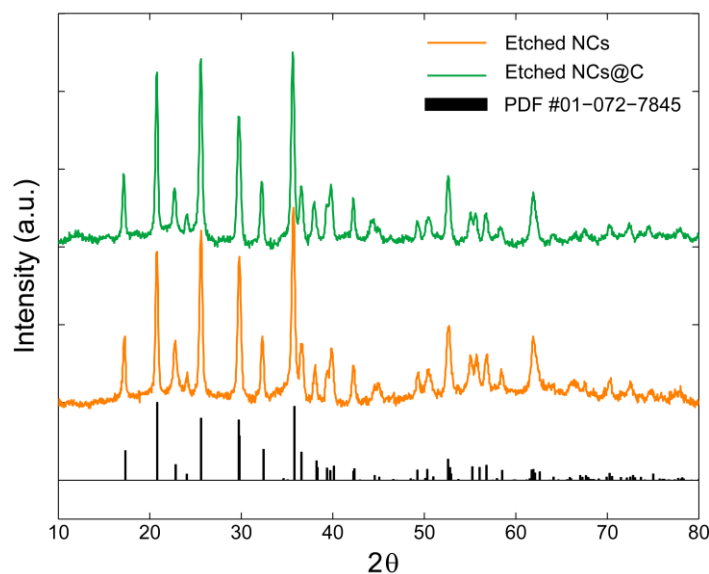

**Figure S5:** XRD patterns of the etched NCs (after  $\text{PF}_6^-$  treatment - orange line) and etched NCs @C (after  $\text{PF}_6^-$  treatment and carbon coating - green line). They are both consistent with olivine-type  $\text{LiFePO}_4$  (PDF card number 01 - 072 - 7845).

## Thermogravimetric analysis (TGA) on as-synthesized and etched NCs

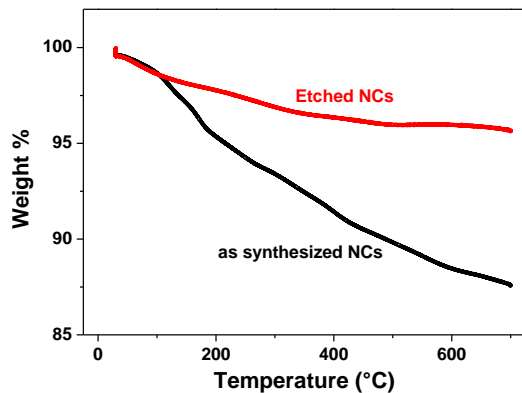

**Figure S6** Thermogravimetric analysis (TGA) of the as-synthesized NCs (black curve) and etched NCs (red curve).

## TEM imaging of etched and carbon coated samples

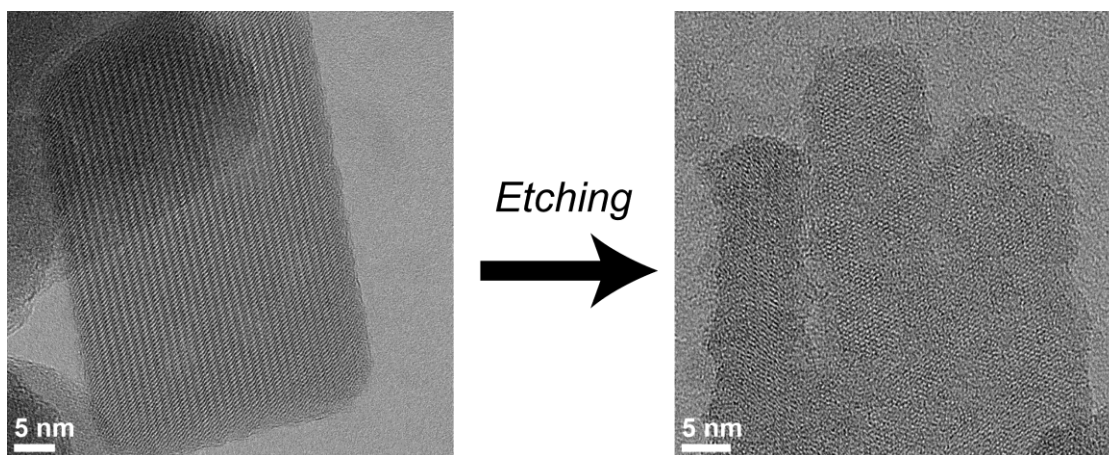

**Figure S7.** TEM images of  $\text{LiFePO}_4$  platelets before and after etching (statistics from HRTEM images showed an increase in roughness from  $0.5 \pm 0.1$  nm to  $0.9 \pm 0.1$  nm).

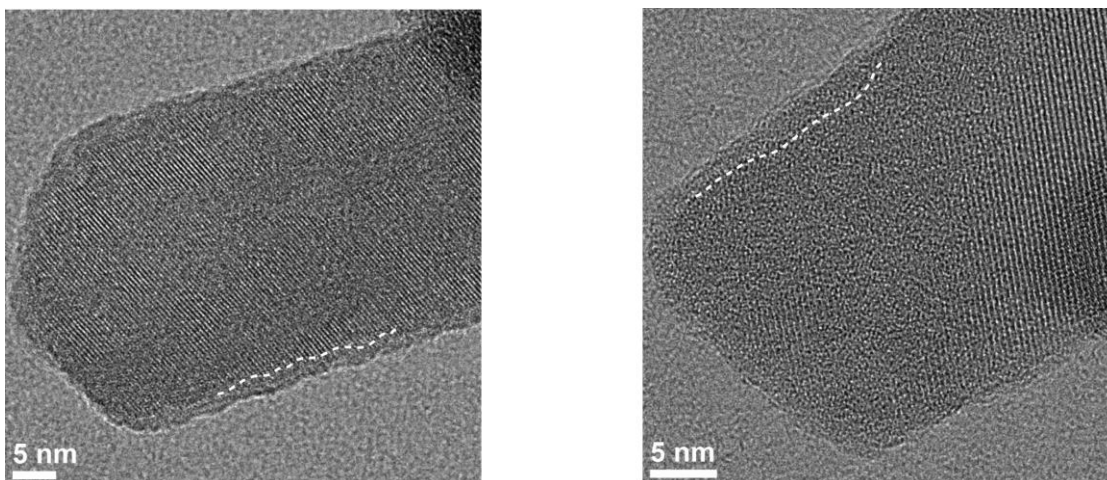

**Figure S8.** TEM analysis of the etched NCs@C evidencing their roughened surface after etching and carbon coating.

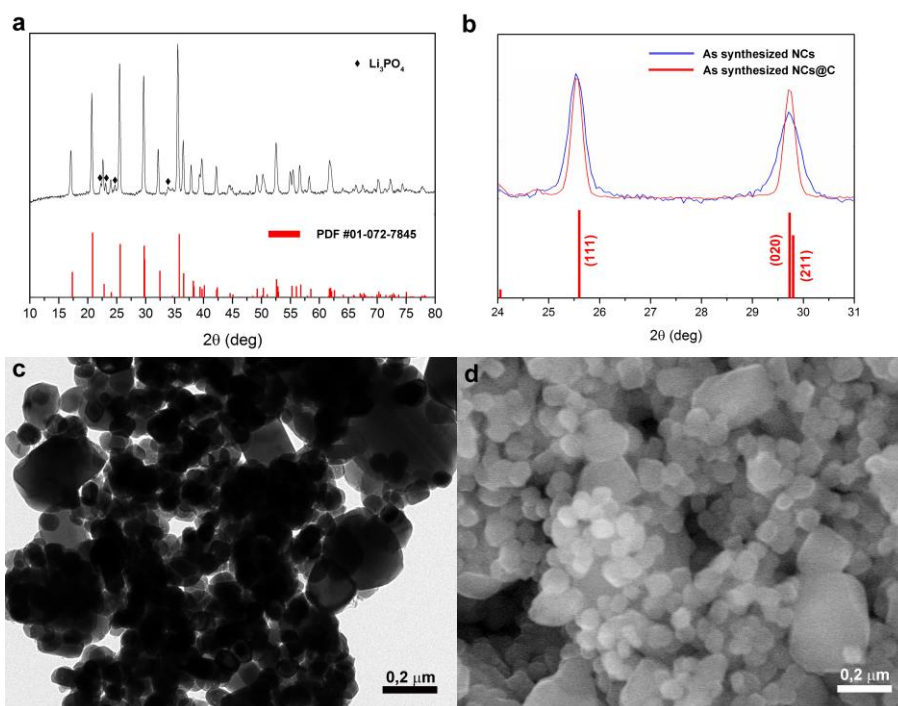

**Figure S9** a) XRD pattern of as synthesized NCs@C showing the presence of  $\text{Li}_3\text{PO}_4$  impurity, b) magnification of low angle part of the XRD pattern displayed in a) for the sample before (blue line) and after carbon coating (red line), c) TEM and d) SEM. images of the as synthesized NCs@C showing the formation of large crystals, due coalescence effects during the carbon coating process,



## Brunauer–Emmett– Teller (BET) surface area results

| Sample               | BET Surface Area (m <sup>2</sup> /g) |
|----------------------|--------------------------------------|
| As-synthesized NCs   | 57.0                                 |
| As-synthesized NCs@C | 22.8                                 |
| Etched NCs           | 70.5                                 |
| Etched NCs@C         | 52.1                                 |

**Table T1.** BET Specific surface areas of LPF NCs

## Additional details on electrodes prepared from as synthesized LiFePO<sub>4</sub> NCs etched LiFePO<sub>4</sub> NCs and carbon coated LiFePO<sub>4</sub> NCs

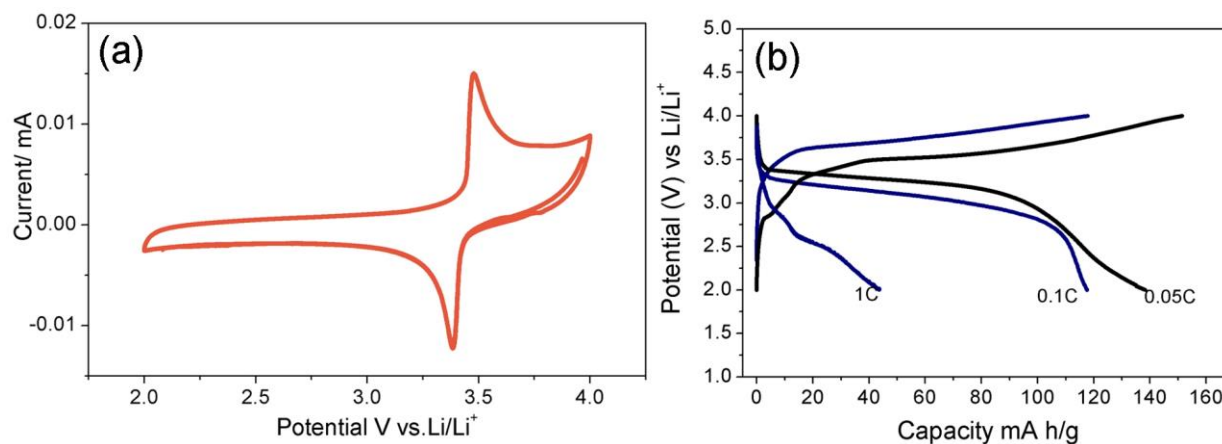

**Figure S10** a) Cyclic voltammetry (CV) of the as-synthesized NCs (with oleylamine as surfactant) electrodes performed at 0.1 mV/s); c) charge/discharge cycles of the as-synthesized NCs electrode at 0.05 C, at 0.1 C and 1 C.



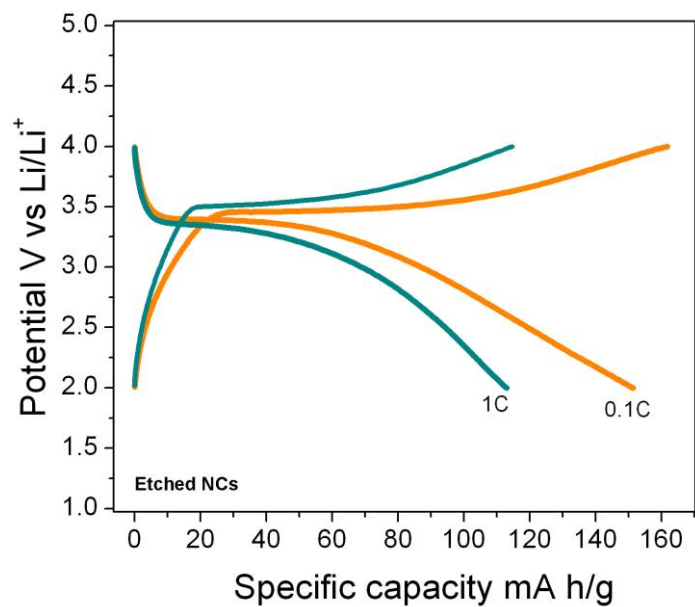

**Figure S11** Charge/discharge cycles of the etched NCs electrode at 0.1 C and at 1 C.

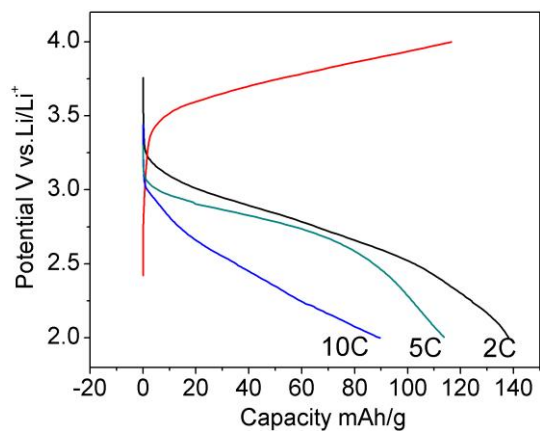

**Figure S12:** a) Charge/discharge cycles of the as-synthesized NCs@C (non-etched carbon coated) at 2C, 5C and 10C.

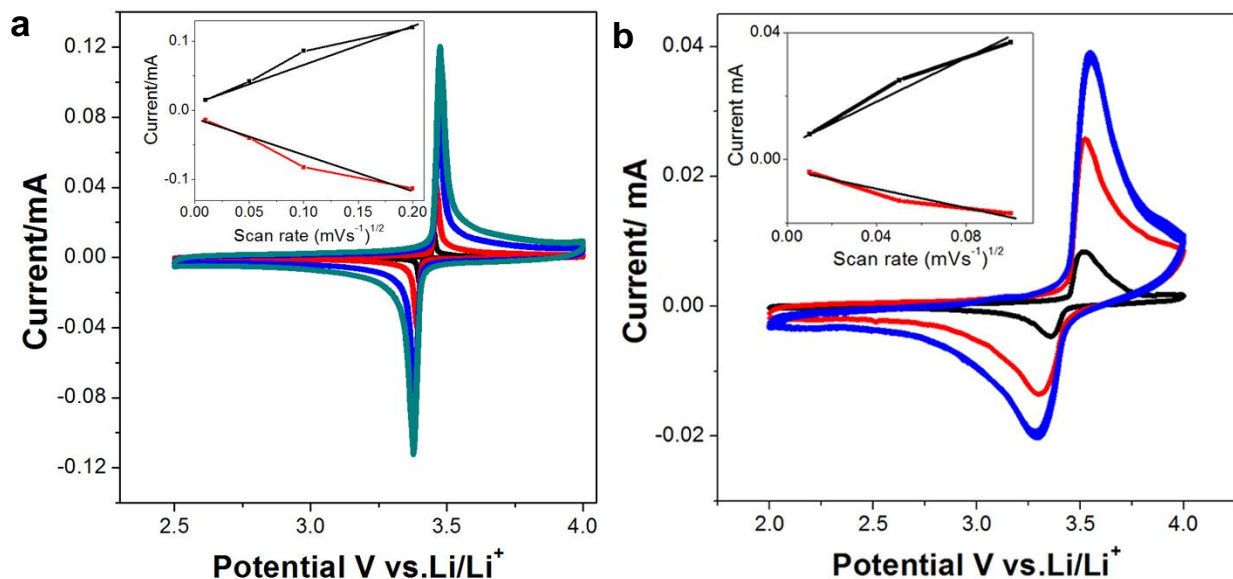

**Figure S13:** The linear plots of  $I_{pc}$  vs  $v^{1/2}$  for a) etched NCs@C samples and b) as synthesized NCs@C. Li ion diffusion coefficient using Randles-Sevcik equation;  $I_{pc}=2.69 \times 10^5 n^{3/2} AD^{1/2} C v^{1/2}$ , where  $I_{pc}$  is peak current (amperes),  $n$  is the number of electrons involved in the metal redox center ( $Fe^{2+}/Fe^{3+}$ ),  $A$  is specific surface area obtained from BET data ( $cm^2$ ),  $D$  is the Li ion diffusion coefficient in  $LiFePO_4$  ( $cm^2 s^{-1}$ ),  $C$  is the molar concentration of Li ions in  $LiFePO_4$  and  $v$  is the scan rate used in the CV ( $Vs^{-1}$ ).

## References

1. Grosvenor, A.P., Kobe, B.A., Biesinger, M.C. & McIntyre, N.S. Investigation of multiplet splitting of Fe 2p XPS spectra and bonding in iron compounds. *Surface and Interface Analysis* **36**, 1564-1574 (2004).
2. Dedryvere, R. et al. X-Ray Photoelectron Spectroscopy Investigations of Carbon-Coated  $Li_xFePO_4$  Materials. *Chemistry of Materials* **20**, 7164-7170 (2008).
3. Bertoni, G. & Verbeeck, J. Accuracy and precision in model based EELS quantification. *Ultramicroscopy* **108**, 782-790 (2008).
4. Verbeeck, J., Van Aert, S. & Bertoni, G. Model-based quantification of EELS spectra: Including the fine structure. *Ultramicroscopy* **106**, 976-980 (2006).
5. Ciancaleoni, G., Zuccaccia, C., Zuccaccia, D. & Macchioni, A. Diffusion and NOE NMR studies on the interactions of neutral amino-acidate arene ruthenium(II) supramolecular aggregates with ions and ion pairs. *Magnetic Resonance in Chemistry* **46**, S72-S79 (2008).
